# Supplementary material for: Ta2O5Nanowires: a novel synthetic method and their solar energy utilization
Source: Royal Society of Chemistry journal article supplement (doi:10.1039/c1dt11124h), 2011-11-01
Supplement: c1dt11124h.pdf [file c1dt11124h.pdf]

## Supplementary Information

### Ta<sub>2</sub>O<sub>5</sub> Nanowires: A Novel Synthetic Method and Their Solar Energy Utilization

Xujie Lü,<sup>a,b</sup> Shangjun Ding,<sup>a,b</sup> Tianquan Lin,<sup>a,b</sup> Xinliang Mou,<sup>a,b</sup> Zhanglian Hong\*<sup>c</sup> and Fuqiang Huang\*<sup>a, d</sup>

<sup>a</sup> CAS Key Laboratory of Materials for Energy Conversion, Shanghai Institute of Ceramics, Chinese Academy of Sciences, Shanghai 200050, P.R. China;

<sup>b</sup> Graduate School of the Chinese Academy of Sciences, Beijing 100049, P.R. China;

<sup>c</sup> State Key Laboratory of Silicon Materials and Department of Materials Science and Engineering, Zhejiang University, Hangzhou 310027, P.R. China;

<sup>d</sup> Beijing National Laboratory for Molecular Sciences and State Key Laboratory of Rare Earth Materials Chemistry and Applications, College of Chemistry and Molecular Engineering, Peking University, Beijing 100871, China.

E-mail: huangfq@mail.sic.ac.cn; hong\_zhanglian@zju.edu.cn; huangfq@pku.edu.cn

#### Experimental details

##### *Preparation*

All the chemicals were purchased commercially and used without further purification. In a typical synthesis of Ta<sub>2</sub>O<sub>5</sub> nanowires, 1.0 g of Ta<sub>2</sub>O<sub>5</sub> powders (analytically pure, Sinopharm) were dissolved in 10 mL of hydrofluoric acid solution (HF 40%), and kept in oil bath at 110 °C for 2 h. The obtained Ta-fluoro complex solution was cooled to room temperature and the pH value of the solution was tuned to about 9.0 by adding 20 mL of ammonia (analytically pure, 30%). Consequently, the white precipitate was obtained (marked as Am-Ta<sub>2</sub>O<sub>5</sub>), and was further washed thoroughly with deionized water to

remove  $\text{NH}_4^+$  and  $\text{F}^-$  ions. Then the precipitate was redissolved in 30 mL of the solution containing hydrogen peroxide (analytically pure, 25 – 28%) and ammonia (5:1 by volume) under continuously stirring to get a precursor. For safety reason, the precursor was heated at 60 °C for 1 h to promote decomposition of  $\text{H}_2\text{O}_2$ , and then was transferred into a Teflon-lined autoclave (50 mL capacity) keeping at 240 °C for 24 h. The resultant precipitate was washed thoroughly with deionized water and ethanol. Finally, the as-prepared product was freeze-dried overnight prior to being characterized.

Nitrogen doped  $\text{Ta}_2\text{O}_5$  products were prepared by annealing  $\text{Ta}_2\text{O}_5$  nanowires under  $\text{NH}_3$  flow at 700, 750 and 800 °C for 3 h. Commercially purchased  $\text{Ta}_2\text{O}_5$  powders were also annealed under  $\text{NH}_3$  flow for reference.

### ***Characterization***

The crystal structure and phase identification of the samples were performed by X-ray diffraction (XRD Bruker D8 ADVANCE) with a monochromatized source of Cu  $\text{K}\alpha_1$  radiation ( $\lambda = 0.15405$  nm) at 1.6 kW (40 KV, 40 mA). A JEOL JSM-6700F scanning electron microscope (SEM) was used to investigate the morphologies of the samples. For field-emission transmission electron microscopy (TEM) observation, the samples were redispersed in ethanol by ultrasonic treatment and dropped on carbon-copper grids. TEM as well as high-resolution transmission electron microscopy (HRTEM) images were collected by using a JEOL JEM 2100F microscope working at 200 kV. The nitrogen sorption measurements were performed using Micromeritics Tristar 3000 at 77 K, and the specific surface area was calculated using the Brunauer–Emmett–Teller (BET) method. The optical absorption characteristics of the powders were determined via UV-Vis diffuse reflectance spectrum (DRS) on a spectrophotometer (Hitachi U4100) equipped with an integrating sphere accessory.

### ***Photocatalytic tests***

The photocatalytic hydrogen generation tests were conducted in a gas-closed circulation system. 100 mg of photocatalyst was dispersed in a solution containing 160 mL of deionized water and 40 mL of methanol as sacrificial reducing agent in a Pyrex cell with a quartz window on the top. The light source was a 500 W Xe lamp covered with a water-cooled quartz jacket. The amount of evolved  $\text{H}_2$  was determined with on-line gas chromatography equipped with a thermal conductivity detector (TCD). Nitrogen was purged through the cell before the photocatalytic reaction to remove oxygen.

The photocatalytic contaminant degradation was investigated by monitoring the degradation kinetics of a model pollutant methyl orange (MO) under UV light. A 500 W high pressure mercury lamp was used as the light source, and a refrigerating water circuit was used to keep the reaction temperature at room temperature. The experiments were performed as follows: 250 mg of photocatalyst was added into

a MO solution (250 mL, 10 mg L<sup>-1</sup>). Before illumination, the suspension was magnetically stirred for 1 h in the dark to reach the adsorption-desorption equilibrium between the MO and the photocatalyst. Then the stirred suspension was exposed to UV irradiation. The concentration of the MO was monitored by tracking the absorbance at 464 nm over time using a Hitachi U-3010 UV-vis spectrophotometer.

### ***DSC Assemblage and Performance Measurement***

The Ta<sub>2</sub>O<sub>5</sub> pastes were prepared applying a similar method given in the literature [*Thin Solid Films* **2008**, 516, 4613]. The fluorine-doped SnO<sub>2</sub> conducting glass (FTO, Pilkington, 2.2 mm thickness, 15 Ω/□) used as current collector was first cleaned, and the paste was coated on the FTO glass by screen-printing (0.25 cm<sup>2</sup>), dried at 100 °C for 15 min and then heated at 500 °C for 30 min. After cooling to 80 °C, the electrodes were immersed into dye solution (0.3 mM, N719 dissolved in ethanol, Dyesol) and kept at room temperature for 20-24 hours to assure completely dye uptake. The counter Pt-electrode was obtained by coating with a drop of H<sub>2</sub>PtCl<sub>6</sub> solution (5 mM isopropanol solution) on the FTO glass and heated at 400 °C for 10 min. The dye-covered Ta<sub>2</sub>O<sub>5</sub> electrode and Pt-counter electrode were assembled into a sandwich type cell. The electrolyte solution was composed of 0.1 M LiI, 0.05 M I<sub>2</sub>, 0.3 M 1,2-dimethyl-3-propylimidazolium iodide, and 0.5 M tert-butylpyridine in 3-methoxypropionitrile. Photocurrent density–voltage characteristics (*J–V* curves) were measured on Keithley Model 2440 source meter under AM 1.5 illumination. A 1000W Oriel solar simulator was used as a light source and the power of the light was calibrated to one sun light intensity by using a NREL-calibrated Si cell (Oriel 91150).

## Figures

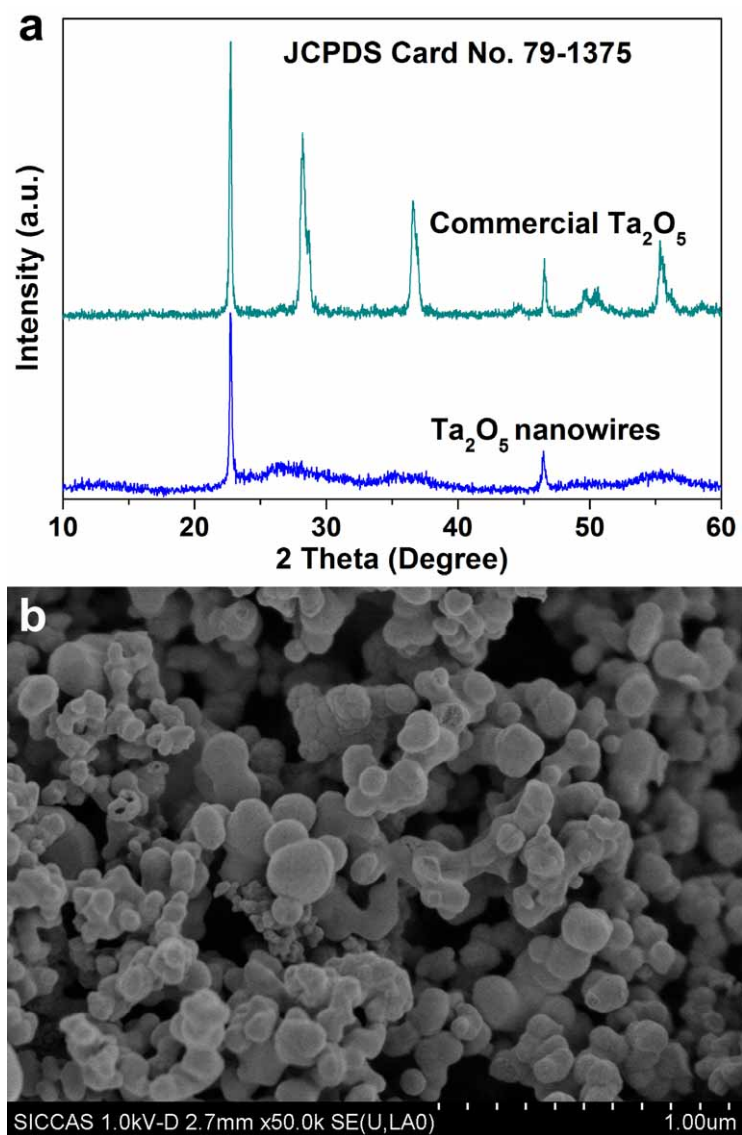

**Fig. S1** a) XRD patterns of Ta<sub>2</sub>O<sub>5</sub> nanowires and commercial Ta<sub>2</sub>O<sub>5</sub>, (b) SEM image of commercial Ta<sub>2</sub>O<sub>5</sub>.

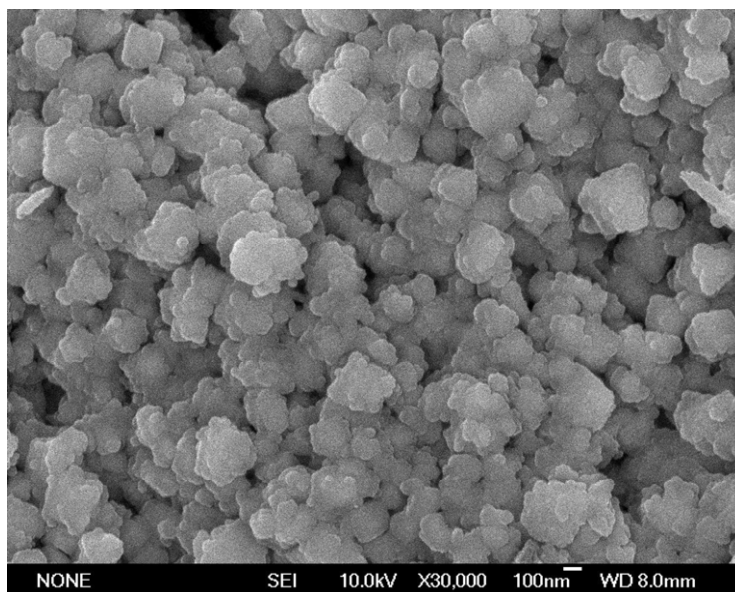

**Fig. S2** SEM image of Ta<sub>2</sub>O<sub>5</sub> particles prepared by adding HF to the precursor.

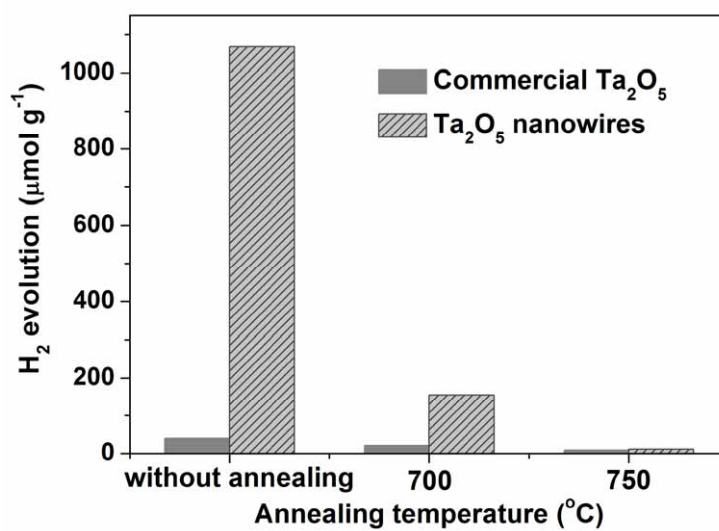

**Fig. S3** Photocatalytic H<sub>2</sub> evolution rates of N-doped Ta<sub>2</sub>O<sub>5</sub> nanowires and commercial Ta<sub>2</sub>O<sub>5</sub> annealed at different temperatures.
